# Supplementary material for: Fullerol C60(OH)24 Nanoparticles and Drought Impact on Wheat (Triticum aestivum L.) during Growth and Infection with Aspergillus flavus
Source: PubMed Central journal article supplement (PMC8004204; doi:10.3390/jof7030236), 2021-03-22
Supplement: jof-07-00236-s001.pdf [file jof-07-00236-s001.pdf]

**Table S1.** Factor loadings of morphometric parameters. Principle component analysis (PCA) was applied for evaluation of morphometric parameters under control (0), drought (PEG), nanoparticle (10, 100 and 1000 ng mL<sup>-1</sup> FNP) and combined drought-nanoparticle treatments (10-PEG, 100-PEG and 1000-PEG). Data were analysed by using STATISTICA 13.5 software package.

| Variable                         | PC1   | PC2   |
|----------------------------------|-------|-------|
| G3                               | -0.56 | 0.65  |
| G4                               | -0.92 | 0.31  |
| G5                               | -0.92 | 0.36  |
| G6                               | -0.89 | 0.41  |
| S3                               | -0.89 | -0.08 |
| S4                               | -0.73 | -0.58 |
| S5                               | -0.73 | -0.63 |
| S6                               | -0.86 | -0.44 |
| Explained variance (eigenvalue)  | 5.40  | 1.73  |
| Proportion of total variance (%) | 67.49 | 21.66 |
| Cumulative variance (%)          | 67.49 | 89.15 |

PC-1 (principal component 1); PC-2 (principal component 2); G3-G6 (germination from 3-6 days), S3-S6 (shoot length from 3-6 days).

**Table S2.** Analyse of variance of morphometric parameters under control (0), drought (PEG), nanoparticle (10, 100 and 1000 ng mL<sup>-1</sup> FNP) and combined drought-nanoparticle treatments (10-PEG, 100-PEG and 1000-PEG). Data were analysed by using factorial ANOVA in STATISTICA 13.5 software package.

| Source of variation | Df | MS     |        |        |        |      |      |       |        |
|---------------------|----|--------|--------|--------|--------|------|------|-------|--------|
|                     |    | G3     | G4     | G5     | G6     | S3   | S4   | S5    | S6     |
| Treatment (T)       | 1  | 2.70   | 280.2* | 266.7* | 247.1* | 4.9* | 9.9* | 27.1* | 51.0*  |
| Nanoparticle (N)    | 3  | 139.4* | 113.8* | 82.5*  | 97.7*  | 0.6* | 1.3* | 2.1*  | 1.2*   |
| T x N               | 3  | 126.8* | 57.2*  | 92.6*  | 103.3* | 0.6* | 0.7* | 2.5*  | 0.3 ns |
| Error               |    | 11.9   | 15.0   | 23.1   | 22.2   | 0.02 | 0.2  | 0.03  | 0.2    |

\* significant at P≤0.05; ns-not significant.

**Table S3.** Analyse of variance of biochemical parameters under control (0), drought (PEG), nanoparticle (10, 100 and 1000 ng mL<sup>-1</sup> FNP) and combined drought-nanoparticle treatments (10-PEG, 100-PEG and 1000-PEG). Data were analysed by using factorial ANOVA in STATISTICA 13.5 software package.

| Source of variation | Df | MS   |          |       |         |           |
|---------------------|----|------|----------|-------|---------|-----------|
|                     |    | APX  | CAT      | POD   | PPO     | MDA       |
| Treatment (T)       | 1  | 0.1* | 11663.7* | 7.3*  | 0.01 ns | 4612.4*   |
| Nanoparticle (N)    | 3  | 1.2* | 10851.1* | 11.4* | 0.04*   | 833.9*    |
| T x N               | 3  | 0.4* | 2574.9*  | 5.4*  | 0.01 ns | 222.04 ns |
| Error               |    | 0.02 | 238.2    | 0.3   | 0.01    | 62.9      |

\* significant at P≤0.05; ns - not significant.

**Table S4.** Correlation among metabolic profile of *A. flavus* and *A. flavus* aggressiveness under different pretreatments and treatments. Spearman's correlation coefficients (R) were calculated for metabolic profile of *A. flavus* and aggressiveness of *A. flavus* in infected pretreated FNP seeds, uninfected FNP seeds and control using STATISTICA 13.5.

|                          | 3-Nitropropionic acid | Aflatoxicol | Aflatoxin B1 | Aflatoxin B2 | Kojic acid | O-Methylsterigmatocystin | AUDPC standard |
|--------------------------|-----------------------|-------------|--------------|--------------|------------|--------------------------|----------------|
| 3-Nitropropionic a.      |                       | 0.17        | 0.71         | 0.32         | 0.61       | 0.50                     | -0.35          |
| Aflatoxicol              | ns                    |             | 0.42         | 0.04         | 0.68       | 0.30                     | 0.14           |
| Aflatoxin B1             | ***                   | *           |              | 0.58         | 0.85       | 0.76                     | -0.40          |
| Aflatoxin B2             | ns                    | ns          | **           |              | 0.37       | 0.72                     | -0.30          |
| Kojic acid               | **                    | ***         | ***          | ns           |            | 0.71                     | -0.16          |
| O-Methylsterigmatocystin | *                     | ns          | ***          | ***          | ***        |                          | -0.17          |
| AUDPC standard           | ns                    | ns          | ns           | ns           | ns         | ns                       |                |

\*correlation is significant at the 0.05 level (2-tailed). \*\*correlation is significant at the 0.01 level (2-tailed). \*\*\*correlation is significant at the 0.01 level (2-tailed). ns-not significant.

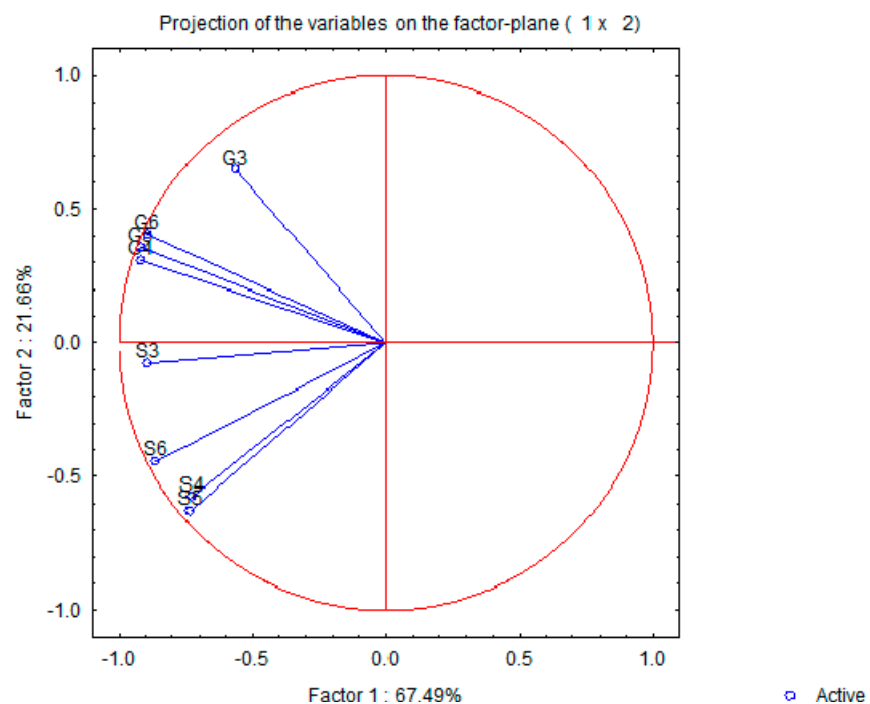

**Figure S1.** Principal component analysis of data sets of morphometric parameters under control (0), drought (PEG), nanoparticle (10, 100 and 1000 ng mL<sup>-1</sup> FNP) and combined drought-nanoparticle treatments (10-PEG, 100-PEG and 1000-PEG). Loadings of first two factors. S3-S6 (shoot length from 3-6 days) and G3-G6 (germination from 3-6 days). PCA was used to distinguish the effect of single treatment application (control, drought or nanoparticles) and combined drought-nanoparticle treatment. Data were analysed by using STATISTICA 13.5 software package.
